# Supplementary material for: A Case of UMOD-Associated Nephropathy Mimicking Focal Segmental Glomerulosclerosis in a Young Male with a Positive Family History
Source: Research Square preprint supplement (doi:10.21203/rs.3.rs-7969434/v1), 2025-11-18
Supplement: Supplementary file 1 [file f91153d79e7f448cfade1516.docx]

**Genetic Testing Department, Sichuan Provincial People's Hospital Genetic Disease Genetic Testing Report**

| Name |  | Sec | Nephrology Outpatient Clinic | Specimen | Blood |
| --- | --- | --- | --- | --- | --- |
| Sex | Male | CaseNo |  | SpeNo | 202405M0620 |
| Age | 33 years | Dept | Medical Genetics Center / Prenatal Diagnosis Center | SpeNo |  |

| **Brief Clinical History** | | | Brief Clinical History: Elevated serum creatinine detected: 118 umol/L. Renal biopsy suggested FSGS-like lesions with global glomerulosclerosis in the majority of glomeruli. Clinical diagnosis: Chronic Kidney Disease Stage 2, Focal Segmental Proliferative Glomerulonephritis. | | | | | | | | |
| --- | --- | --- | --- | --- | --- | --- | --- | --- | --- | --- | --- |
|
|
| **HPO Terms** | | | HP:0000077: Abnormality of the kidney; HP:0003259: Elevated serum creatinine; HP:0012622: Chronic kidney disease; HP:0000097: Focal segmental glomerulosclerosis; HP:0000099: Glomerulonephritis | | | | | | | | |
| **Clinically Suspected Disease/Genes of Focus** | | | Hereditary renal system disease / Genes of focus are listed in Appendix 1. | | | | | | | | |
| **Testing Item** | | | Whole Exome Sequencing | | | | | | | | |
| **Testing Method and Content** | | | Targeted region capture and high-throughput sequencing technology were used to sequence the exonic coding regions of approximately 20,000 functional genes in the human genome + mitochondrial genome sequences. | | | | | | | | |
| **Test Results:** | | |  | | | | | | | | |
| **Gene** | | **Genomic Coordinate (GRCh38)** | **Transcript & Exon** | | **Nucleotide & Amino Acid Change** | **Zygosity** | **Population Frequency** | **Pathogenicity Prediction** | **ACMG Classification** | **Inheritance Pattern** | **Associated Disease** | **Variant Origin** |
| UMOD | | chr16: 20360510 | NM_003361.4: exon 3 | | c.113A>T (p.Asn38Ile) | Het | － | － | VUS | AD | ADTKD | unknown |
| Remarks: Zygosity: Het denotes heterozygous mutation, Hom denotes homozygous mutation, Hemi denotes hemizygous mutation, N denotes no mutation detected. Prediction: P: Predicted pathogenic; B: Predicted benign; - Unknown. Inheritance Mode: AD denotes Autosomal Dominant, AR denotes Autosomal Recessive, XLR denotes X-Linked Recessive. Score: Bayesian framework Uncertain locus score and corresponding pathogenicity probability: <0 (0.1%); 0 (10%); 1 (18.8%); 2 (32.5%); 3 (50%); 4 (67.5%); 5 (81.2%); ≥6 (≥90%). | | | | | | | | | | | | |
| **Result Analysis:**  1. UMOD Gene Variant: The proband was found to have a heterozygous variant in the UMOD gene: c.113A>T (p.Asn38Ile). This variant is a missense mutation. It has been reported in the literature in patients clinically diagnosed with Autosomal Dominant Tubulointerstitial Kidney Disease. It is absent from normal population databases, indicating it is a rare variant (PM2). The genetic origin of this variant is currently unknown. According to the ACMG guidelines, this variant is classified as a Variant of Uncertain Significance (VUS) (PM2=2).  2. Disease Association: UMOD gene variants can cause **Autosomal Dominant Tubulointerstitial Kidney Disease 1 (OMIM: 162000, ADTKD1)**. This condition is an adult-onset, slowly progressive nephropathy characterized by elevated serum uric acid levels | | | | | | | | | | | | |

**Genetic Testing Department, Sichuan Provincial People's Hospital Genetic Disease Genetic Testing Report**

| Name |  | Sec | Nephrology Outpatient Clinic | Specimen | Blood |
| --- | --- | --- | --- | --- | --- |
| Sex | Male | CaseNo |  | SpeNo | 202405M0620 |
| Age | 33 years | Dept | Medical Genetics Center / Prenatal Diagnosis Center | SpeNo |  |

| (hyperuricemia), defective urine concentrating ability, and eventual progression to end-stage renal failure. Some patients may present with gouty arthritis. (Cont.) arterial hypertension, polydipsia/polyuria, mild proteinuria, etc. Renal ultrasound may show small kidneys or increased echogenicity. Renal biopsy may reveal tubular atrophy, interstitial fibrosis, tubular microcystic dilation, tubular basement membrane thickening, medullary cysts, secondary glomerulosclerosis, or cystic changes. The average age of progression to end-stage renal disease is 56 years (range 50-65 years). This disease exhibits significant phenotypic heterogeneity and incomplete penetrance. ADTKD1 is inherited in an autosomal dominant manner, and heterozygous pathogenic variants in the UMOD gene can cause the disease.  3. The above conclusions are based on current research into genetic etiology and are not final diagnoses. They are for reference only. Please integrate with the individual's disease phenotype, family history, and other test results for comprehensive analysis.  4. It is recommended to visit the Genetic Counseling and Prenatal Diagnosis outpatient clinic for consultation regarding these results.  Clinic Schedule: Monday, Wednesday, Friday mornings; Tuesday afternoons (Associate Chief Physician Ma Tao); Wednesday, Thursday afternoons (Chief Physician Yang Jiyun). |
| --- |

| **Appendix 1 Testing Methods and Limitations** |
| --- |

**Testing Method:**

This method uses genomic DNA extracted from the patient's blood as the testing material. The DNA is fragmented, and a library is prepared. The DNA of the target gene exons and adjacent splice regions is then captured and enriched using a chip, followed by variant detection using a high-throughput sequencing platform.

**Test Scope and Limitations:**

1. This technical method can detect variants in gene exons and adjacent ±20 bp intronic regions (including single nucleotide variants and insertions/deletions within 20 bp), and can suggest exon-level copy number variations. It cannot detect genomic structural variations (e.g., large deletions, duplications, and inversions), large insertions (such as Alu-mediated insertions), mutations in gene regulatory regions or deep intronic regions, dynamic mutations, or complex rearrangements. This method cannot fully cover highly repetitive regions, GC-rich regions, highly complex regions, or pseudogene regions. Furthermore, during data analysis, to ensure accuracy, a small number of variants with excessively low sequencing quality in the target region will be filtered out. Therefore, this method may have a certain false-negative probability.

2. Based on the patient's chief complaint, this analysis used Human Phenotype Ontology (HPO) and/or Online Mendelian Inheritance in Man (OMIM) terms to filter candidate pathogenic genes. Genes related to polygenic susceptibility and complex diseases are not included in this analysis.

3. This report is limited to pathogenic, likely pathogenic, or variants of uncertain significance related to the patient's clinical phenotype and not conflicting with the patient's family genetic history. The laboratory cannot guarantee the authenticity, accuracy, or comprehensiveness of the clinical manifestations or clinically suspected diseases provided by the physician or the patient. For samples with inaccurate or incomplete clinical phenotypes and family history provided, there is a risk of imprecise variant prioritization.

4. Not all variants listed in this report will necessarily cause disease in the patient. Pathogenicity requires comprehensive analysis based on the variant's impact, inheritance pattern, clinical features, and other factors. The information in this report regarding disease correlation, correlation explanations, variant-associated diseases, and clinical features is derived from existing published research and based on the current level of medical knowledge. We cannot guarantee that all literature has been queried or the latest literature tracked. These interpretations may change as medicine advances. Therefore, the above conclusions are based on laboratory testing data and do not represent a final diagnosis; they are for clinical.

| **Appendix 2. Targeted Capture High-Throughput Sequencing Parameters** | | | | | | |
| --- | --- | --- | --- | --- | --- | --- |
| Sample ID | Raw Data Output (Mb) | Target Region Length (bp) | Target Region Coverage | Target Region Mean Depth (X) | % of Target Region with >10X Coverage | % of Target Region with >20X Coverage |
| 202405M0620 | 13680 | 42500000 | 99.80% | 181.76 | 99.30% | 99.00% |

**Appendix Table 1. List of Genes Analyzed**

| ACE | IFT43 | CLDN19 | PKHD1 | BBS12 | MMAA | FGF23 | SLC3A1 |
| --- | --- | --- | --- | --- | --- | --- | --- |
| ACTN4 | IFT80 | CNNM2 | PLA2R1 | BBS2 | MMAB | FGFR1 | SLC4A1 |
| ADAMTS13 | INF2 | COL4A3 | PLCE1 | BBS4 | MMACHC | FLG | SLC4A4 |
| ADCK3 | INPP5E | COL4A4 | PMM2 | BBS5 | MMADHC | FN1 | SLC5A2 |
| ADCK4 | INVS | COL4A5 | PTPRO | BBS7 | MME | FRAS1 | SLC7A7 |
| AGT | IQCB1 | COQ2 | REN | BBS9 | MTHFR | FREM2 | SLC7A9 |
| AGTR1 | ITGA3 | COQ6 | RET | BMP4 | MTRR | FXYD2 | SMARCAL1 |
| AGXT | ITGA8 | COQ9 | ROBO2 | BMP7 | MUC1 | GATA3 | SOX17 |
| AHI1 | ITGB4 | CRB2 | RPGRIP1L | BSND | MUT | GDNF | TCTN2 |
| ALG1 | KAL1 | CSPP1 | SALL1 | C1QA | MYH9 | GLA | TCTN3 |
| ALMS1 | KANK1 | CTBP1 | SARS2 | C1QB | MYO1E | GLIS2 | THBD |
| AMH | KANK2 | CTNS | SCARB2 | C1QC | NEIL1 | GPC3 | THSD7A |
| ANKS6 | KANK4 | CUBN | SCNN1A | C3 | NEK1 | GRHPR | TMEM138 |
| ANLN | KCNA1 | CUL3 | SCNN1B | CA2 | NEK8 | GRIP1 | TMEM216 |
| APOA1 | KCNJ1 | CYP27B1 | SCNN1G | CASR | NPHP1 | HNF1B | TMEM231 |
| APOE | KCNJ10 | CYP2R1 | SDCCAG8 | CBS | NPHP3 | HOGA1 | TMEM237 |
| APOL1 | KLHL3 | DGKE | SIX1 | CC2D2A | NPHP4 | HPSE2 | TMEM67 |
| APRT | LAMA3 | DIS3L2 | SIX2 | CD151 | NPHS1 | IFT122 | TNXB |
| AQP2 | LAMB2 | DMP1 | SIX5 | CD2AP | NPHS2 | IFT140 | COL4A6 |
| ARHGAP24 | LAMB3 | DSTYK | SLC12A1 | CD46 | NUP107 | IFT172 | CLDN16 |
| ARHGDIA | LAMC2 | DYNC2H1 | SLC12A3 | CDC5L | NUP205 | WDR73 | WDR34 |
| ARL6 | LMBRD1 | EGF | SLC17A5 | CEP164 | NUP93 | WNK1 | WDPCP |
| ATP6V0A4 | LMX1B | EMP2 | SLC1A1 | CEP290 | OCRL | WNK4 | UPK3A |
| ATP6V1B1 | LRIG2 | ENPP1 | SLC22A12 | CEP41 | OFD1 | WNT4 | TTC21B |
| AVPR2 | LYZ | EYA1 | SLC2A2 | CFB | PAX2 | WT1 | TRPC6 |
| B2M | LZTFL1 | FAT1 | SLC2A9 | CFH | PDE6D | XDH | WDR19 |
| B9D1 | MAPK11 | FGA | SLC34A1 | CFHR5 | PDGFRA | XPO1 |  |
| B9D2 | MEFV | FGF12 | SLC34A3 | CFI | PDSS1 | ZMPSTE24 |  |
| BBS1 | MKKS | FGF18 | SLC35A2 | CHD1L | PDSS2 | ZNF423 |  |
| BBS10 | MKS1 | FGF20 | SLC36A2 | CLCN5 | PEX1 | WDR35 |  |
| CLCNKA | PHEX | WDR60 | VDR | TTC8 | TRPM6 | TRAP1 |  |
| CLCNKB | PKD1 | PKD2 | WAS | UMOD | TSC2 | TRIM32 |  |
